# Supplementary material for: Synthesis of highly crystalline Bi2Te3nanotubes and their enhanced thermoelectric properties
Source: Royal Society of Chemistry journal article supplement (doi:10.1039/c4ta02532f), 2014-06-06
Supplement: c4ta02532f1.pdf [file c4ta02532f1.pdf]

## Supporting Information

### Synthesis of highly crystalline $\text{Bi}_2\text{Te}_3$ nanotubes and their enhanced thermoelectric properties

Hangtian Zhu, Jun Luo, \* Jingkui Liang

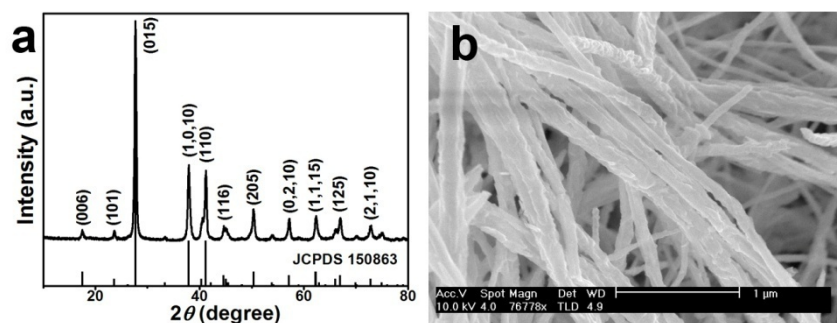

**Fig. S1** (a) XRD pattern and (b) SEM image of  $\text{Bi}_2\text{Te}_3$  nanotubes after a reaction time of one day in the absence of PVP.

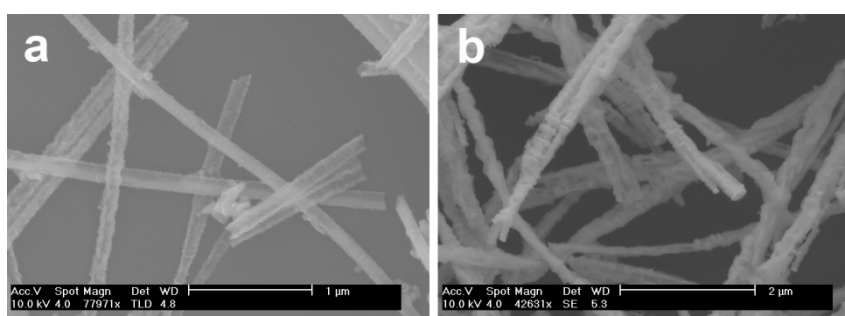

**Fig. S2** (a)  $\text{Bi}_2\text{Te}_3$  nanotubes and (b) nanorods synthesized by a two-step reaction using Te nanorods as precursor with and without PVP, respectively.

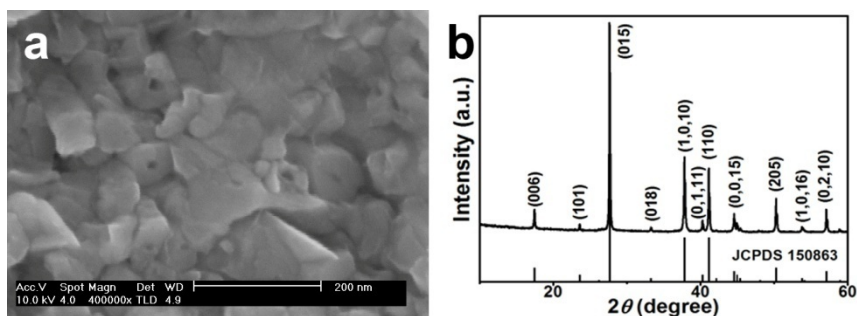

**Fig. S3** (a) SEM image and (b) XRD pattern of the compressed  $\text{Bi}_2\text{Te}_3$  pellet.
